# Supplementary material for: Designing 3D graphene networks via a 3D-printed Ni template
Source: Royal Society of Chemistry journal article supplement (doi:10.1039/c5ra03454j), 2015-01-01
Supplement: c5ra03454j1.pdf [file c5ra03454j1.pdf]

## Supporting information

### 1. Material synthesis

The Ni template was printed using a FORWARD LM180 SLM System, Harbin Forward Multidimensional Intelligent Device Co. Ltd. The processing parameters are as follows: the laser power of 200 W, scanning speed of 1000 m/s, hatch spacing of 0.07 mm and layer thickness of 0.04 mm. The unit cell of the 3D-printed Ni scaffold is of square shape with strut length around 1 mm and wall thickness around 390  $\mu\text{m}$ . A small piece of 5.4 mm (L) x 5.4 mm (D) x 7.0 mm (H) was used for study. To improve the surface finish, the as-received template was annealed at 1370°C for 9 h under Ar and H<sub>2</sub>. The annealed template was then put in a tube furnace for subsequent graphene growth via a standard CVD. Briefly, the 3D template was first activated at 1000°C for 10 min under Ar flow of 180 ml/min and H<sub>2</sub> flow of 200 ml/min, then followed by the injection of the styrene carbon source at a rate of 0.254 ml/h controlled by a syringe pump (Razel Scientific Instrument, INC. USA), still under the same mixture gas flow for 1 h. Finally, the sample was cooled down naturally to room temperature under a reduced Ar flow of 50 ml/min. The 3D graphene networks were obtained by refluxing the Ni/graphene composite in 3 M HCl at 80°C for at least 3 days to remove the Ni template, and the final product was checked by energy-dispersive X-ray spectroscopy (EDS). Scheme S1 illustrates the key steps for the synthesis of the 3D graphene.

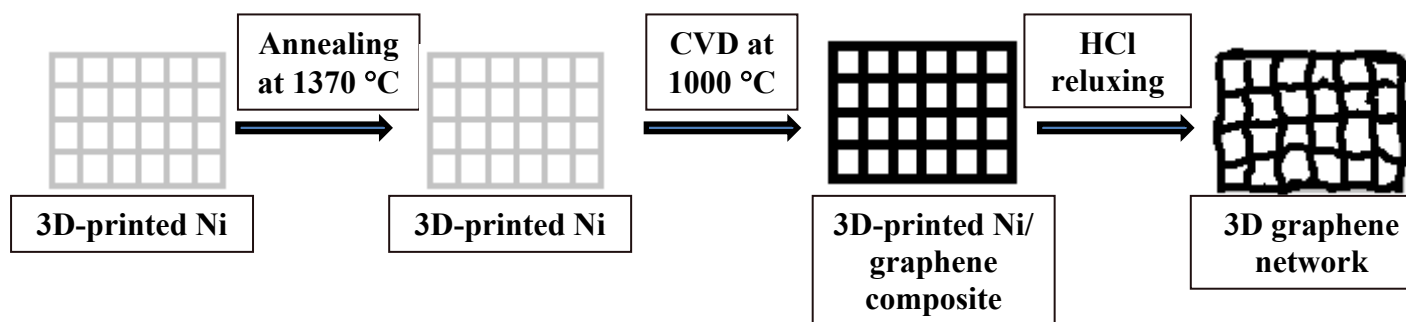

Scheme S1: Schematic illustration of the 3D graphene network creation.

### 2 Material Characterisation

3D imaging of the annealed Ni template was performed using an *X-tek BenchTop 160Xi CT* scanning system, in which the sample was X-rayed over 360 degrees to create a 3D model of the sample. Scanning electron microscopy (SEM) images and EDS were recorded using a JSM6390LV microscope operated at 20 kV. Transmission electron microscopy (TEM) images were obtained on a JEM-2100 operated at 200 kV. For the TEM sample, a piece of

the as prepared 3D graphene/Ni networks was probe sonicated in acetone, then the suspension was dropped onto a holey carbon coated copper grid (300 mesh, Agar). Raman spectra were acquired using a Renishaw RM1000 Raman microscope (RENISHAW, Wootton-Under-Edge, UK), with excitation at 532 nm and a 50 × microscope objective lens.

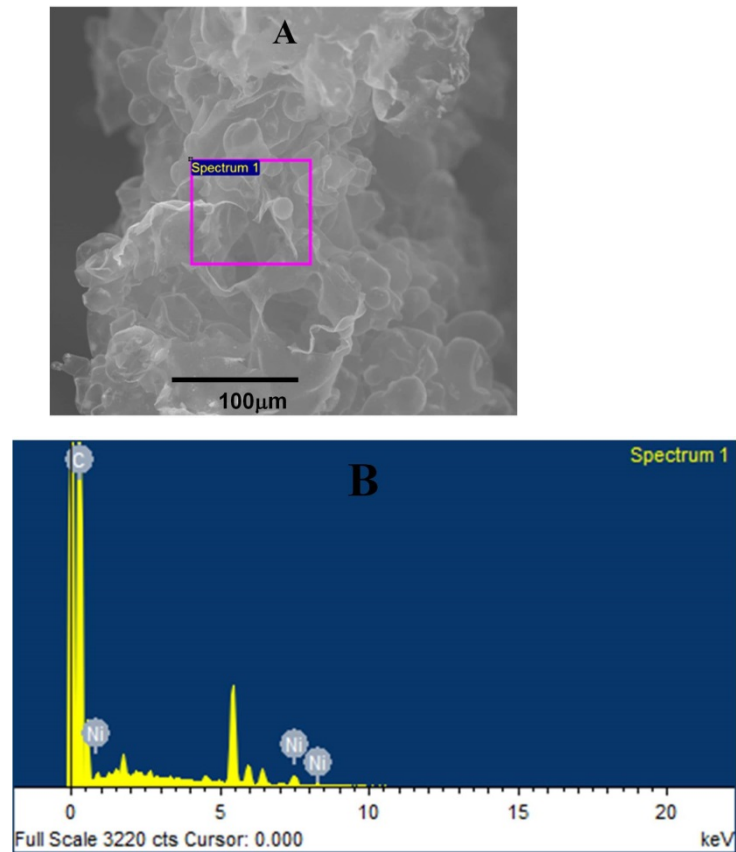

**Fig. S1** SEM image (A) and corresponding EDS results (B) obtained from the selected box in the image of 3D graphene networks after the removal of the Ni (C content is 97.5wt% and Ni is 2.5wt%)

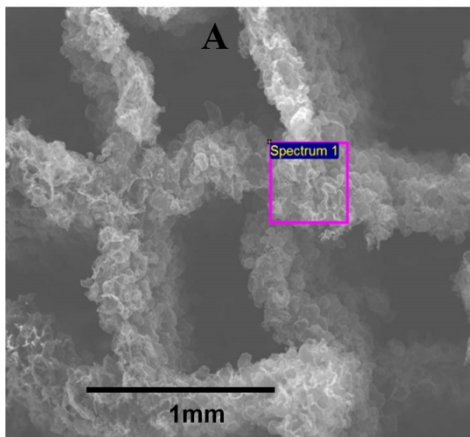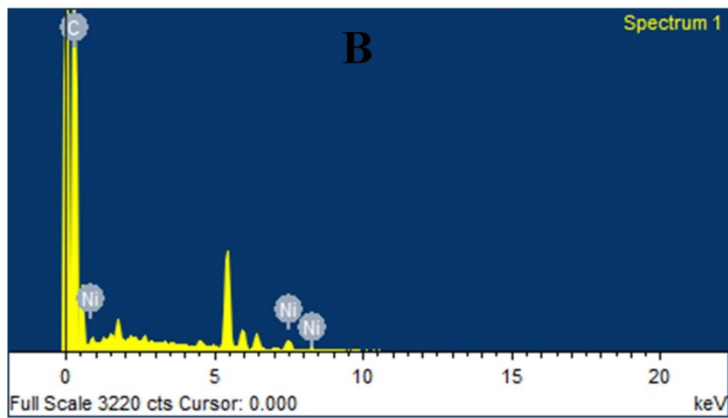

**Fig. S2** SEM image (A) and corresponding EDS results (B) obtained from the selected box in the image of 3D graphene networks after the removal of the Ni (C content is 98.6wt% and Ni is 1.4wt%)
